# Supplementary material for: Surface engineering-modulated porous N-doped rod-like molybdenum phosphide catalysts: towards high activity and stability for hydrogen evolution reaction over a wide pH range
Source: Royal Society of Chemistry journal article supplement (doi:10.1039/c8ra03909g), 2018-01-01
Supplement: c8ra03909g1.pdf [file c8ra03909g1.pdf]

**Electronic Supplementary information:**

Surface Engineering-modulated Porous N-doped Rod-like Molybdenum  
Phosphide Catalysts: towards High Activity and Stability for Hydrogen  
Evolution Reaction over a Wide pH Range

Liyang Chai,<sup>a</sup> Wenyu Yuan,<sup>b</sup> Xue Cui,<sup>a</sup> Haiying Jiang,<sup>a</sup> Junwang Tang,<sup>c</sup> Xiaohui Guo<sup>\*a</sup>

<sup>a</sup> Prof. Dr. Xiaohui Guo, Dr. Yu Qiu, Liyang Chai, Xue Cui, Haiying Jiang, Key Lab of Synthetic and Natural Functional Molecule Chemistry of Ministry of Education, and the College of Chemistry and Materials Science, College of Chemistry and Materials Science, Northwest University, Xi'an 710069, P. R. China

<sup>b</sup> Dr. Wenyu Yuan, Science and Technology on Thermostructural Composite Materials Laboratory, Northwestern Polytechnical University, 710072, Xi'an, P. R. China.

<sup>c</sup> Prof. Junwang Tang, Department of Chemical Engineering, UCL, Torrington Place, London, WC1E 7JE, UK.

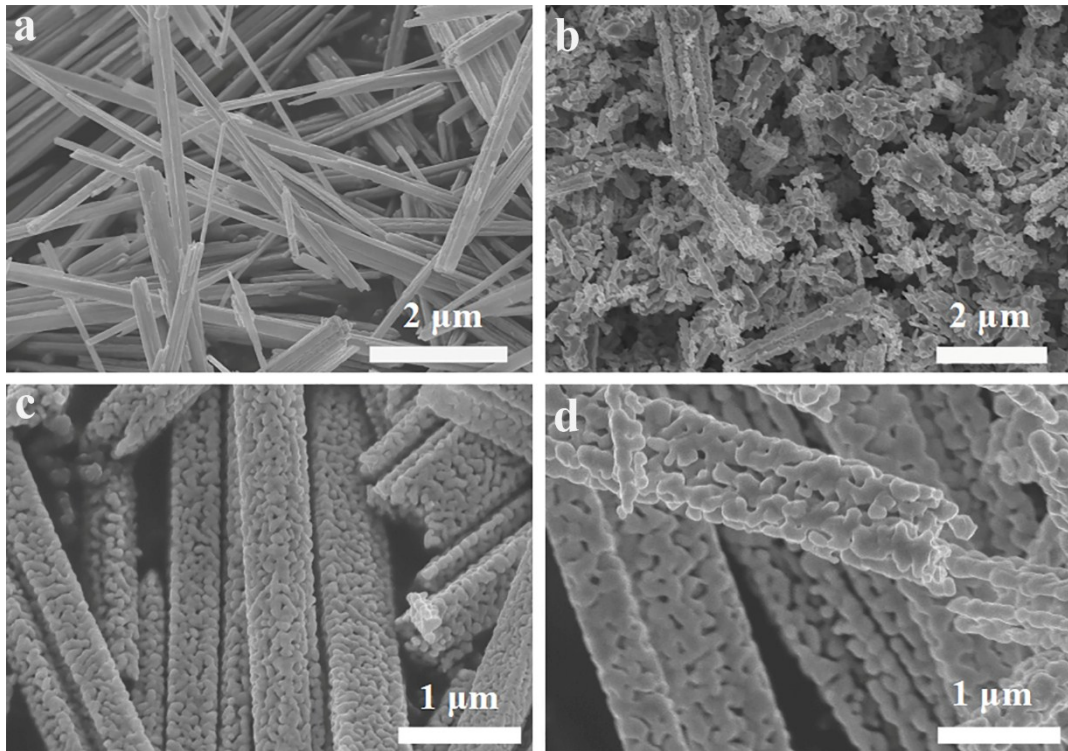

**Figure S1.** FESEM images of (a)  $\text{Mo}_3\text{O}_{10}/\text{EDA}$ , (b) MoP, (c) N-MoP-750 and (d) N-MoP-850.

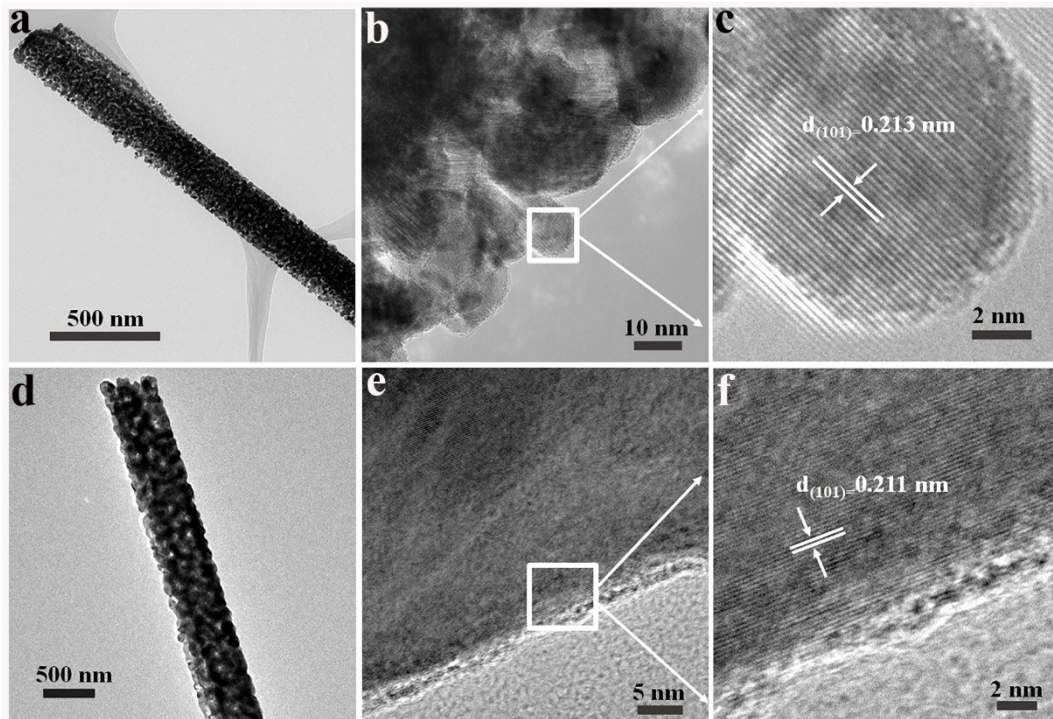

**Figure S2.** (a, b) TEM images of N-MoP-750; (d, e) TEM images of N-MoP-850; (c) and (f) are HRTEM images of a part of N-MoP-750 in (b) and N-MoP-850 in (f),

respectively.

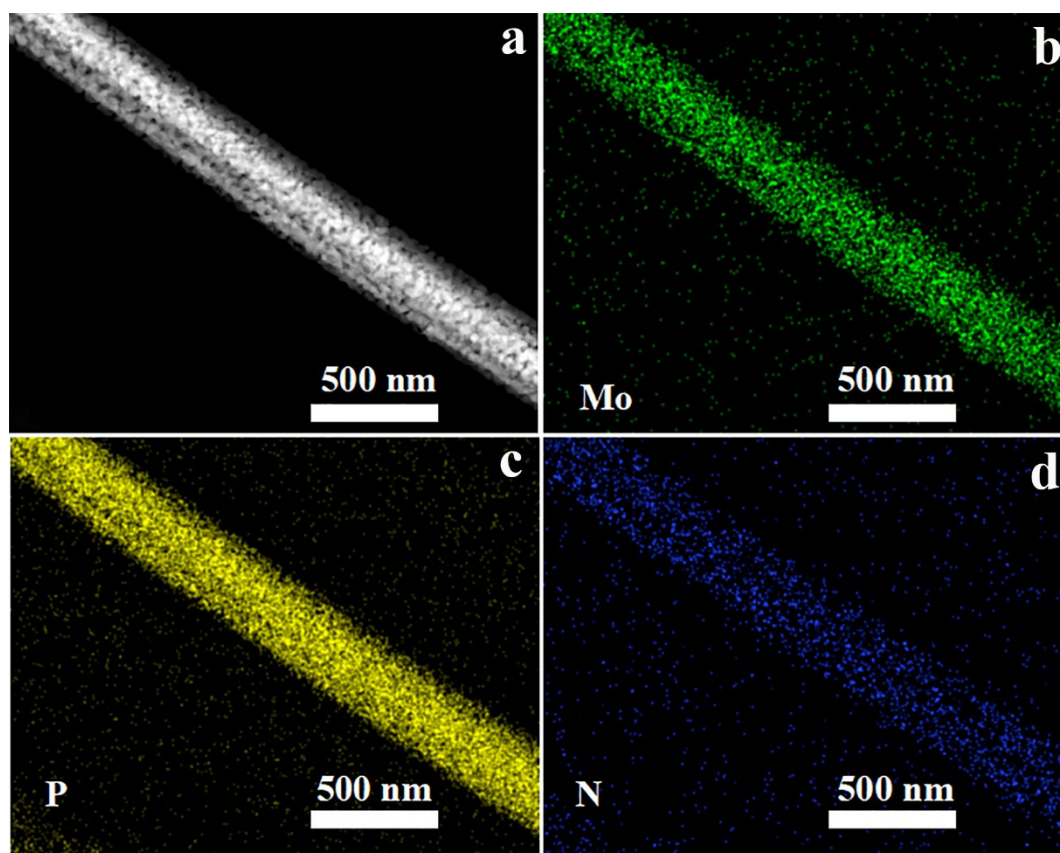

**Figure S3.** Element mapping analysis for N-MoP-750 sample, a) HADDF image; b) mapping image of Mo element; c) mapping image of P element; d) mapping image of N element.



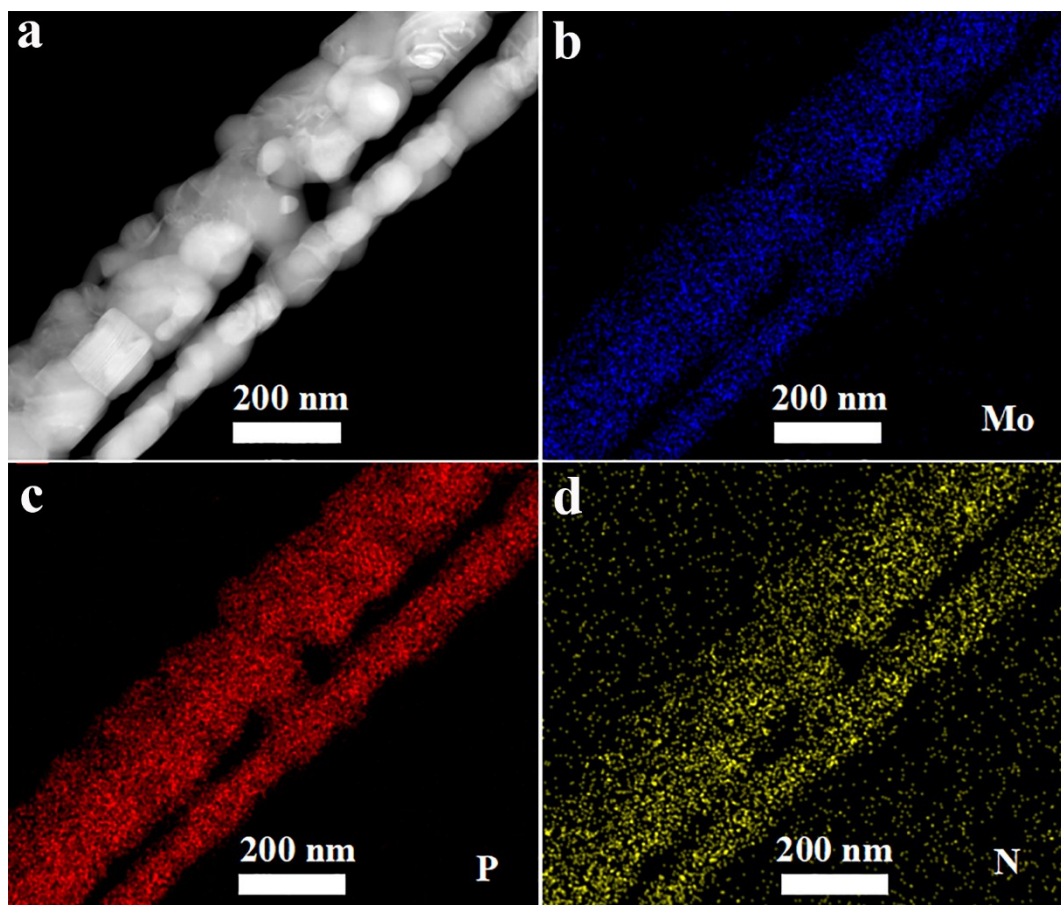

**Figure S4.** Element mapping analysis for N-MoP-850 sample, a) HADDF image; b) mapping image of Mo element; c) mapping image of P element; d) mapping image of N element.

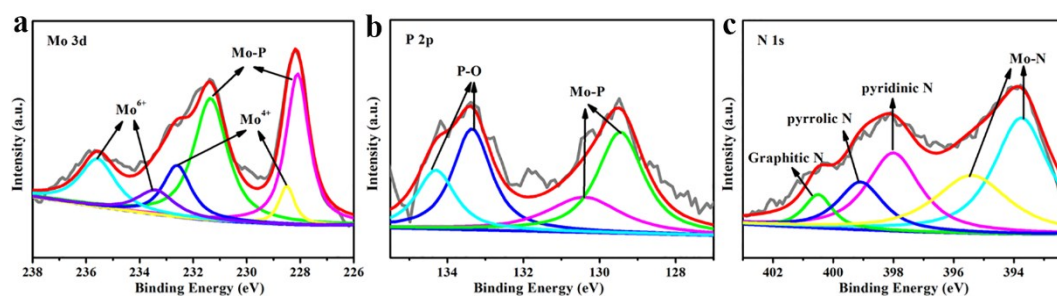

**Figure S5.** High resolution XPS spectra of (a) Mo 3d, (b) P 2p and (c) N 1s for N-MoP-750 sample.

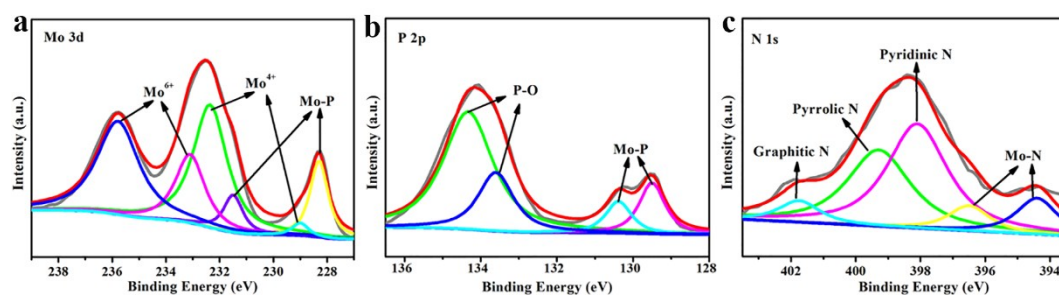

**Figure S6.** High resolution XPS spectra of (a) Mo 3d, (b) P 2p and (c) N 1s for N-MoP-850 sample.

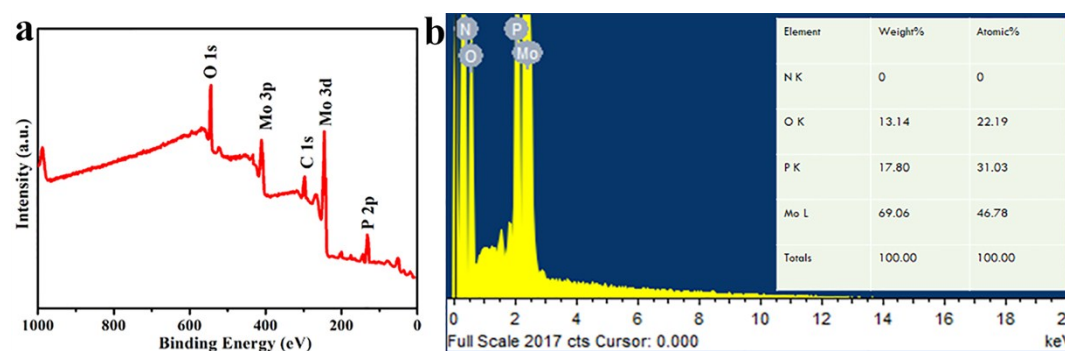

**Figure S7.** (a) XPS survey spectrum of MoP. (b) EDS pattern of MoP.

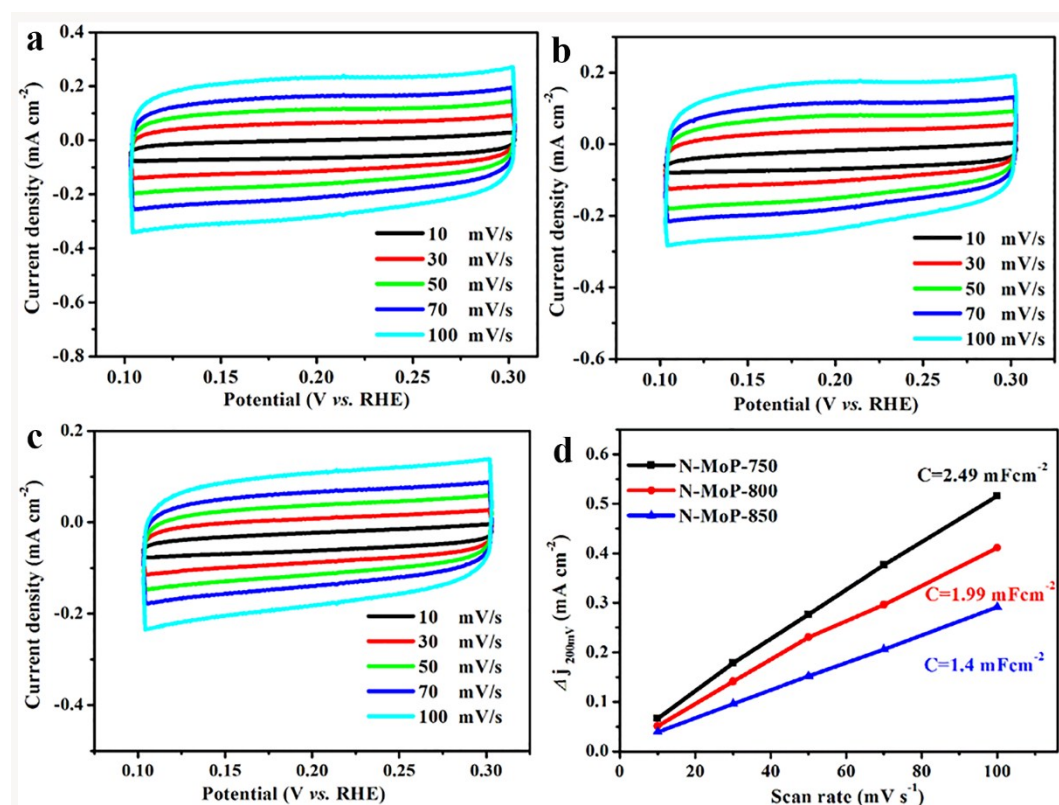

**Figure S8.** CV curves for (a) N-MoP-750; (b) N-MoP-800 and (c) N-MoP-850 at different rates from 10 to 100 mV s<sup>-1</sup> in 1 M KOH; (d) the relationship curve between capacitive current and scan rate for N-MoP-750, N-MoP-800 and N-MoP-850 at 0.2 V ( $\Delta j = j_a - j_c$ ).

**Table S1.** Comparison of HER performance of N-MoP with previously reported MoP based electrocatalysts in acid and basic media

| Catalyst                             | Onset $\eta$ (mV) | $\eta$ (mV) (at 10 mA/cm <sup>2</sup> ) | Tafer Slope (mV/dec) | Electrolyte solution                 | Ref.      |
|--------------------------------------|-------------------|-----------------------------------------|----------------------|--------------------------------------|-----------|
| N-doped MoP nanorod                  | 65                | 136 (10)                                | 58.66                | 0.5 M H <sub>2</sub> SO <sub>4</sub> | This work |
|                                      | 68                | 145 (10)                                | 71.15                | 1M KOH                               |           |
| MoP@NC                               | 80                | 135 (10)                                | 57                   | 0.5 M H <sub>2</sub> SO <sub>4</sub> | 1         |
| MoP NPs                              | —                 | 225(10)                                 | 65                   | 0.5 M H <sub>2</sub> SO <sub>4</sub> | 2         |
|                                      | —                 | 276(10)                                 | 105                  | 1.0 M KOH                            |           |
| P-MoP                                | 60                | 191 (10)                                | 56                   | 0.5 M H <sub>2</sub> SO <sub>4</sub> | 3         |
| MoP-graphite nanosheets              | 320 (VS Ag/AgCl)  | 460 (10) (VS Ag/AgCl)                   | 63                   | 0.5 M H <sub>2</sub> SO <sub>4</sub> | 4         |
| Electrochemically activated MoP      | 80                | 150 (10)                                | 50                   | 0.5 M H <sub>2</sub> SO <sub>4</sub> | 5         |
|                                      | —                 | 190 (10)                                | —                    | 1.0 M KOH                            |           |
| MoP                                  | 100               | 246 (10)                                | 60                   | 0.5 M H <sub>2</sub> SO <sub>4</sub> | 6         |
| MoS <sub>2(1-x)</sub> P <sub>x</sub> | —                 | 150 (10)                                | 57                   | 0.5 M H <sub>2</sub> SO <sub>4</sub> | 7         |
| TPC-MoPs                             | 65                | 126(10)                                 | 68.5                 | 0.5 M H <sub>2</sub> SO <sub>4</sub> | 8         |
| CoMoP                                | 85                | 215                                     | 50                   | 0.5 M H <sub>2</sub> SO <sub>4</sub> | 9         |
| rGO-A-MoP                            | 82                | 152(10)                                 | 88                   | 0.5 M H <sub>2</sub> SO <sub>4</sub> | 10        |
|                                      | 94                | 162(10)                                 | 57                   | 1.0 M KOH                            |           |
| MoP/SN                               | 44                | 104(10)                                 | 45.49                | 0.5 M H <sub>2</sub> SO <sub>4</sub> | 11        |
|                                      | 10                | 94(10)                                  | 59.7                 | 1.0 M KOH                            |           |
| MoP/CC                               | —                 | 148(10)                                 | 55                   | 0.5 M H <sub>2</sub> SO <sub>4</sub> | 12        |
| MoP NPs                              | —                 | 110(10)                                 | 45                   | 0.5 M H <sub>2</sub> SO <sub>4</sub> | 13        |
| MoP-CA2                              | 40                | 125(10)                                 | 54                   | 0.5 M H <sub>2</sub> SO <sub>4</sub> | 14        |
| MoP@PC                               | 48                | 47(10)                                  | 45                   | 0.5 M H <sub>2</sub> SO <sub>4</sub> | 15        |

## References:

- 1 S. Gao, Y. P. Liu, G. D. Li, Y. C. Guo, Y. C. Zou, X. X. Zou, *Electrochim. Acta*, 2016, 199, 99-107.
- 2 H. J. Yan, Y. Q. Jiao, A. P. Wu, C. G. Tian, X. M. Zhang, L. Wang, Z. Y. Ren, H. G. Fu, *Chem. Commun.*, 2016, 52, 9530-9533.
- 3 C. Deng, F. Ding, X. Y. Li, Y. F. Guo, W. Ni, H. Yan, K. N. Sun and Y. M. Yan, *J. Mater. Chem. A*, 2016, 4, 59-66.
- 4 S. S. J. Aravind, K. Ramanujachary, A. Mugweru, T. D. Vaden, *Appl. Catal., A*, 2015, 490, 101-107.
- 5 T. Y. Wang, K. Z. Du, W. L. Liu, Z. W. Zhu, Y. H. Shao and M. X. Li, *J. Mater. Chem. A*, 2015, 3, 4368-4373.
- 6 X. B. Chen, D. Z. Wang, Z. P. Wang, P. Zhou, Z. Z. Wu, F. Jiang, *Chem. Commun.*, 2014, 50, 11683-11685.
- 7 R. Q. Ye, P. del. Angel-Vicente, Y. Y. Liu, M. J. Arellano-Jimenez, Z. W. Peng, T. Wang, Y. L. Li, B. I. Yakobson, S. H. Wei, M. J. Yacaman and J. M. Tour, *Adv. Mater.*, 2016, 28, 1427-1432.
- 8 Z. Q. Yao, Y. Z. Su, C. B. Lu, C. Q. Yang, Z. X. Xu, J. H. Zhu, X. D. Zhuang and F. Zhang, *New J. Chem.*, 2016, 40, 6015-6021.
- 9 D. Z. Wang, X. Y. Zhang, D. Z. Zhang, Y. L. Shen and Z. Z. Wu, *Appl. Catal., A*, 2016, 511, 11-15.
- 10 K. Ojha, M. Sharma, H. Kolev and A. K. Ganguli, *Catal. Sci. Technol.*, 2017, 7, 668-676.
- 11 M. A. R. Anjum and J. S. Lee, *ACS Catal.*, 2017, 7, 3030-3038.
- 12 X. D. Wang, Y. F. Xu, H. S. Rao, W. J. Xu, H. Y. Chen, W. X. Zhang, D. B. Kuang and C. Y. Su, *Energy Environ. Sci.*, 2016, 9, 1468-1475.
- 13 J. M. McEnaney, J. C. Crompton, J. F. Callejas, E. J. Popczun, A. J. Biacchi, N. S. Lewis and R. E. Schaak, *Chem. Mater.*, 2014, 26, 4826-4831.
- 14 Z. C. Xing, Q. Liu, A. M. Asiri and X. P. Sun, *Adv. Mater.*, 2014, 26, 5702-5707.
- 15 S. Han, Y. L. Feng, F. Zhang, C. Q. Yang, Z. Q. Yao, W. X. Zhao, F. Qiu, L. Y. Yang, Y. F. Yao, X. D. Zhuang and X. L. Feng, *Adv. Funct. Mater.*, 2015, 25, 3899-3906.
